# Supplementary material
Source: Springer Nature journal article supplement (https://www.springermedizin.de/resource/supplementary/12958_2014_1238_MOESM3_ESM.pdf/9567126)

Relative Expression (arbitrary units)

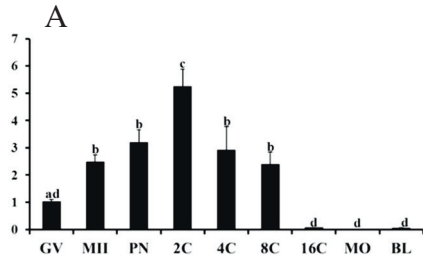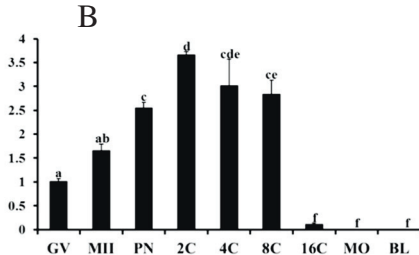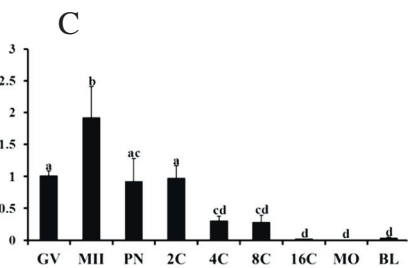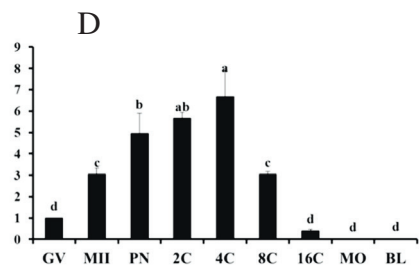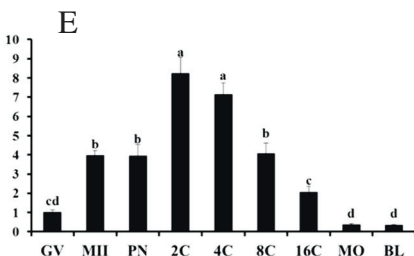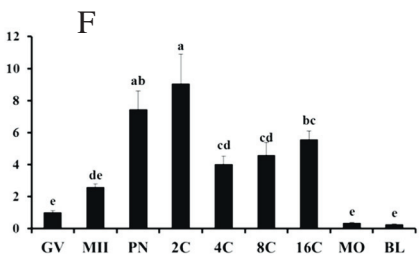

Supplement: MOESM3 [file 9567126]
